# Supplementary material
Source: Springer Nature journal article supplement (https://www.springermedizin.de/resource/supplementary/12902_2006_28_MOESM5_ESM.pdf/9516092)

(c)

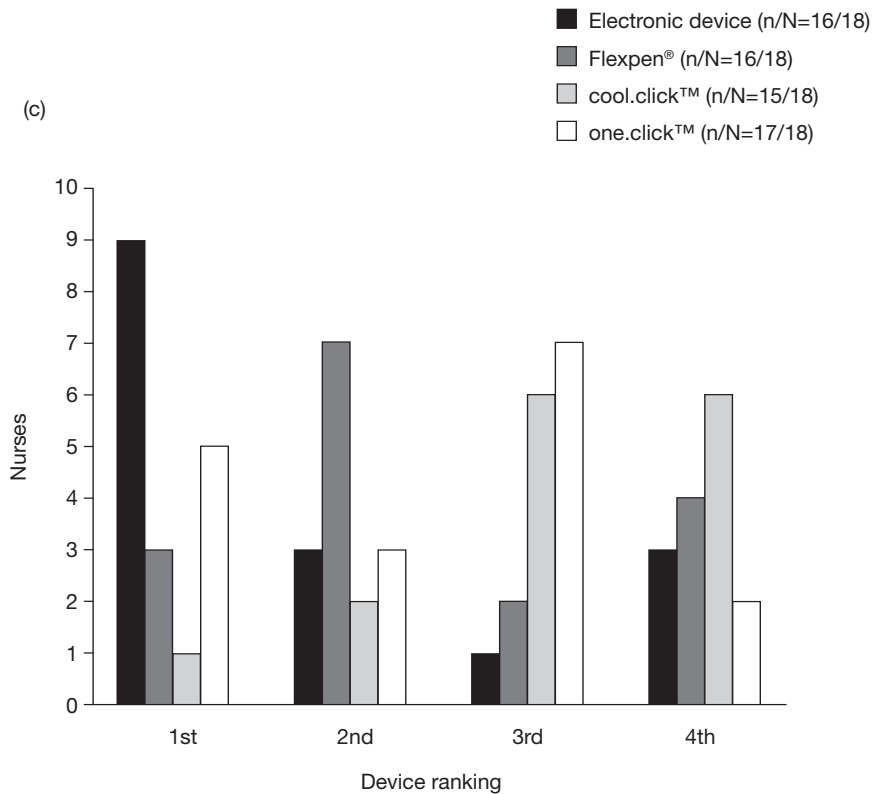

Supplement: MOESM5 [file 9516092]
